# Supplementary material for: Scenario Analysis of Renewable Energy Development and Carbon Emission in the Beijing–Tianjin–Hebei Region
Source: MDPI journal article supplement (doi:10.3390/land11101659), 2022-09-26
Supplement: s1 [file s1]

## Supplementary Material

**Table S1.** Main parameters and data sources of SD model

| Type      | Factor                                                                | Unit                                     | Value/Equation                        | Data sources                                         |
|-----------|-----------------------------------------------------------------------|------------------------------------------|---------------------------------------|------------------------------------------------------|
| Stocks    | Gross domestic product (GDP)                                          | 10 <sup>8</sup> yuan                     | INTEG(GDPG,9497.7)                    | Statistical yearbook of Beijing, Tianjin and Hebei   |
|           | Total population (POP)                                                | 10 <sup>4</sup> people                   | INTEG(POPG,7871.2)                    | Statistical yearbook of Beijing, Tianjin and Hebei   |
|           | Conventional energy consumption (CEC)                                 | 10 <sup>4</sup> tce                      | INTEG(CECG,15917.9)                   | Statistical yearbook of Beijing, Tianjin and Hebei   |
|           | Renewable energy consumption (NEC)                                    | 10 <sup>8</sup> kWh                      | INTEG(NECG + NETP,33.74)              | China Energy Statistical Yearbook                    |
|           | Subsidy intensity (SI)                                                | 10 <sup>8</sup> yuan                     | INTEG(-SI*SDR,0.0028)                 | [1]                                                  |
| Flows     | GDP growth per year (GDPG)                                            | 10 <sup>8</sup> yuan                     | GDP*GGR                               | Endogenous                                           |
|           | Population growth per year (POPG)                                     | 10 <sup>4</sup> people                   | PGR*POP                               | Endogenous                                           |
|           | Conventional energy consumption growth per year (CECG)                | 10 <sup>4</sup> tce                      | CEGR * CEC *(1/ RFET <sub>0</sub> )   | Endogenous                                           |
|           | Renewable energy consumption growth per year (NECG)                   | 10 <sup>8</sup> kWh                      | NEC * NEGR * RFET <sub>0</sub>        | Endogenous                                           |
|           | Subsidy decline rate (SDR)                                            | 10 <sup>8</sup> yuan                     | ((STEP(0.0092, 49)+STEP(0.0026, 73))) | [1]                                                  |
| Constants | Proportion of environmental protection investment (PEI <sub>0</sub> ) | %                                        | 1.1                                   | [2]                                                  |
|           | Proportion of R&D (PRI <sub>0</sub> )                                 | %                                        | 0.5                                   | China Statistical Yearbook on Science and Technology |
|           | Coefficient of environmental                                          | Mt CO <sub>2</sub> /10 <sup>8</sup> yuan | 0.02432                               | China Energy Statistical                             |

|           |                                                         |                         |                                                                                                                                                                                                                                                                                                                                                                             |                                                         |
|-----------|---------------------------------------------------------|-------------------------|-----------------------------------------------------------------------------------------------------------------------------------------------------------------------------------------------------------------------------------------------------------------------------------------------------------------------------------------------------------------------------|---------------------------------------------------------|
|           | protection investment ( $CEI_0$ )                       |                         |                                                                                                                                                                                                                                                                                                                                                                             | Yearbook; [3]                                           |
|           | Environmental capacity coefficient ( $ECC_0$ )          | -                       | 0.08                                                                                                                                                                                                                                                                                                                                                                        | Expert estimation method                                |
|           | Standard coefficient of renewable energy ( $SCNE_0$ )   | $10^4$ t ce/ $10^8$ kWh | 1.129                                                                                                                                                                                                                                                                                                                                                                       | China Energy Statistical Yearbook                       |
|           | Economic benefit per unit renewable energy ( $EBNE_0$ ) | $10^8$ yuan/ $10^4$ tce | 0.45                                                                                                                                                                                                                                                                                                                                                                        | [4]                                                     |
|           | Regulatory factors of energy tax ( $RFET_0$ )           | -                       | 1                                                                                                                                                                                                                                                                                                                                                                           | [4]                                                     |
| Variables | GDP growth rate (GGR)                                   | -                       | WITH LOOKUP (Time ([ (2000,0)-(2050,0.5)], (2000,0.125), (2001,0.308), (2002,-0.008), (2003,0.188), (2004,0.159), (2005,0.151), (2006,0.217), (2007,0.167), (2008,0.087), (2009,0.173), (2010,0.173), (2011,0.096), (2012,0.082), (2013,0.062), (2014,0.056), (2015,0.08), (2016,0.089), (2017,0.082), (2018,0.071), (2020,0.07), (2030,0.045), (2040,0.035), (2050,0.025)) | Statistical yearbook of Beijing, Tianjin and Hebei; [5] |
|           | Population growth rate (PGR)                            | -                       | WITH LOOKUP (Time ([ (2000,0)-(2019,0.03)], (2000,0.021), (2001,0.006), (2002,0.009), (2003,0.008), (2004,0.009), (2005,0.011), (2006,0.013), (2007,0.014), (2008,0.016), (2009,0.015), (2010,0.029), (2011,0.011), (2012,0.011), (2013,0.01), (2014,0.009), (2015,0.006), (2016,0.005), (2017,0.005), (2018,0.002), (2019,0.004), (2027,0), (2030,-0.001))                 | Statistical yearbook of Beijing, Tianjin and Hebei; [6] |
|           | Conventional energy growth rate ( $CEGR$ )              | -                       | WITH LOOKUP (Time ([ (2000,0.01)-(2019,1)], (2000,0.14), (2001,0.06), (2002,0.083), (2003,0.11), (2004,0.13), (2005,0.11), (2006,0.094), (2007,0.08), (2008,0.03), (2009,0.05), (2010,0.056), (2011,0.07), (2012,0.035), (2013,0.039), (2014,-0.02), (2015,0.04), (2016,0.006), (2017,0.012), (2018,0.009), (2019,0.015), (2030,0.005), (2040, 0.003), (2050, 0.001))       | Statistical yearbook of Beijing, Tianjin and Hebei      |
|           | Renewable energy growth rate ( $NEGR$ )                 | -                       | WITH LOOKUP (Time ([ (2000,0)-(2019,0.3)], (2000,0.001), (2001,0.006), (2002,0.039), (2003,0.072), (2004,0.003), (2005,0.005),                                                                                                                                                                                                                                              | China Energy Statistical Yearbook                       |

|  |                                                                         |                                          |                                                                                                                                                                                                                                                                        |                          |
|--|-------------------------------------------------------------------------|------------------------------------------|------------------------------------------------------------------------------------------------------------------------------------------------------------------------------------------------------------------------------------------------------------------------|--------------------------|
|  |                                                                         |                                          | (2006,0.084), (2007,0.009), (2008,0.054), (2009,0.101), (2010,0.124), (2011,0.103), (2012,0.065), (2013,0.077), (2014,0.061), (2015,0.131), (2016,0.201), (2017,0.125), (2018,0.148), (2020,0.112), (2025,0.042), (2030,0.025), (2035,0.005), (2040,0.001), (2045,0) ) |                          |
|  | Renewable energy tax factor (NETF)                                      | -                                        | WITH LOOKUP (Time ([ (2010,0.1)- (2050,0.125)]), (2010,0.1), (2011,0.11), (2012,0.11), (2013,0.11), (2014,0.11), (2015,0.12), (2016,0.125), (2017,0.125), (2018,0.125), (2019,0.125), (2030,0.12), (2040,0.11) )                                                       | [4]                      |
|  | Environmental protection investment (EPI)                               | 10 <sup>8</sup> yuan                     | GDP* PEI <sub>0</sub>                                                                                                                                                                                                                                                  | Endogenous               |
|  | CO <sub>2</sub> reduction by environmental protection investment (CEPI) | Mt CO <sub>2</sub>                       | EPI * CEI <sub>0</sub>                                                                                                                                                                                                                                                 | Endogenous               |
|  | Factors of CO <sub>2</sub> reduction policies (FCRP)                    | -                                        | 0.005495+0.001365*SIN(3.14*(Time-2020))                                                                                                                                                                                                                                | [2]                      |
|  | CO <sub>2</sub> reduction by policies (CRP)                             | Mt CO <sub>2</sub>                       | EC * FCRP                                                                                                                                                                                                                                                              | [4]                      |
|  | CO <sub>2</sub> emissions (TCE)                                         | Mt CO <sub>2</sub>                       | CEC *0.02475*(1/ RFET <sub>0</sub> )+ SNEC *0-( CRP + CEPI)                                                                                                                                                                                                            | [2]                      |
|  | Renewable energy incentive factors (NEIF)                               | 10 <sup>8</sup> yuan/Mt CO <sub>2</sub>  | TCE *10 <sup>-7</sup>                                                                                                                                                                                                                                                  | Expert estimation method |
|  | Investment proportion of renewable energy industry (IPNE)               | -                                        | 0.003* NEIF                                                                                                                                                                                                                                                            | Expert estimation method |
|  | Investment of renewable energy industry (INEI)                          | 10 <sup>8</sup> yuan                     | GDP* IPNE                                                                                                                                                                                                                                                              | Endogenous               |
|  | R&D investment in renewable energy industry (RINE)                      | 10 <sup>8</sup> yuan                     | INEI + PRI <sub>0</sub> *GDP                                                                                                                                                                                                                                           | Endogenous               |
|  | Technological progress coefficient (TPC)                                | 10 <sup>4</sup> tce/10 <sup>8</sup> yuan | RINE *1.004                                                                                                                                                                                                                                                            | Expert estimation method |
|  | Added value of                                                          | 10 <sup>4</sup> tce                      | TPC *0.0498                                                                                                                                                                                                                                                            | China Energy             |

|  |                                                           |                            |                                 |                                   |
|--|-----------------------------------------------------------|----------------------------|---------------------------------|-----------------------------------|
|  | renewable energy brought by technological progress (NETP) |                            |                                 | Statistical Yearbook              |
|  | Standard renewable energy consumption (SNEC)              | $10^4$ tce                 | $NEC * SCNE_0$                  | China Energy Statistical Yearbook |
|  | Economic benefit of renewable energy (EBNE)               | $10^8$ yuan                | $SNEC * EBNE_0$                 | Endogenous                        |
|  | Output value of renewable energy (OVNE)                   | $10^8$ yuan                | $EBNE * (1 - NETF) + SI + INEI$ | [4]                               |
|  | Total energy consumption (TEC)                            | $10^4$ tce                 | $CEC + SNEC$                    | Endogenous                        |
|  | Energy consumption per capita (ECP)                       | tce /person                | $TEC / POP$                     | Endogenous                        |
|  | Carbon emission per capita (CEP)                          | Mt CO <sub>2</sub> /person | $TCE / POP$                     | Endogenous                        |
|  | Energy pollution coefficient (EPC)                        | -                          | $(CEC * 0.78 + SNEC * 0) / TEC$ | [4]                               |
|  | Environmental capacity (EC)                               | -                          | $TEC * ECC_0 * (1 / EPC)$       | [4]                               |
|  | Energy consumption structure (ECS)                        | -                          | $CEC / SNEC$                    | [5]                               |
|  | Energy intensity (EI)                                     | tce/ $10^4$ yuan           | $TEC / GDP$                     | [7]                               |

## Reference

- [1] Cheng Y.; Mu D. Study on optimal subsidy strategy in new energy vehicle supply chain based on SD game model. *China Popul., Resour. Environ.* **2018**, *28*(12):29–39. (in Chinese)
- [2] Zhou X.; Xu Z.; Xi Y. The system dynamic model and policy optimized simulation of energy conservation and emission reduction in China. *Systems Eng. Theory Pract.* **2018**, *38*(06), 1422–44. (in Chinese)
- [3] Ye F.; Fang X.; Li L.; Li Y.; Chang C. Allocation of carbon dioxide emission quotas based on the energy-economy-environment perspective: Evidence from Guangdong Province. *Sci. Total. Environ.* **2019**, *669*, 657–667.
- [4] Huang G.; Xu C. Analysis on the influencing factors and dynamic characteristics of new energy industry development under the low carbon perspective. *J. Chongqing Univ. Technol. (Nat. Sci.)*. **2020**, *34*(12), 206–17. (in Chinese)
- [5] Yang H.; Li X.; Ma L.; Li Z. Using system dynamics to analyse key factors influencing China's

energy-related CO<sub>2</sub> emissions and emission reduction scenarios. *J. Clean. Prod.* **2021**, *320*, 128811.

- [6] Zhang F.; Deng X.; Xie L.; Xu N. China's energy-related carbon emissions projections for the shared socioeconomic pathways. *Resour. Conserv. Recy.* **2021**, *168*, 105456.
- [7] Zhang F.; Deng X.; Phillips F.; Fang C.; Wang C. Impacts of industrial structure and technical progress on carbon emission intensity: Evidence from 281 cities in China. *Technol. Forecast. Soc.* **2020**, *154*, 119949.
